# Supplementary material
Source: HighWire-hosted journal article supplement (doi:10.1101/rna.073692.119)
Supplement: Supplemental_Material_.pdf [file Supplemental_Material_.pdf]

## Supplementary Information (SI)

### **Ppp1r1b-lncRNA Inhibits PRC2 at Myogenic Regulatory Genes to Promote Cardiac and Skeletal Muscle Development in Mouse and Human**

Xuedong Kang<sup>1,2</sup>, Yan Zhao<sup>1,2</sup>, Glen Van Arsdell<sup>3</sup>, Stanley F. Nelson<sup>1,4,5,6</sup>, Marlin Touma<sup>\*1,2,5-9</sup>.

#### **AUTHORS AFFILIATION**

1. Department of Pediatrics, David Geffen School of Medicine, University of California Los Angeles, Los Angeles, CA.
2. Neonatal/Congenital Heart Laboratory, Cardiovascular Research Laboratory, University of California Los Angeles, Los Angeles, CA.
3. Department of Cardiothoracic Surgery, David Geffen School of Medicine, University of California Los Angeles, Los Angeles, CA.
4. Department of Neurology, David Geffen School of Medicine, University of California Los Angeles, Los Angeles, CA.
5. Department of Human Genetics, David Geffen School of Medicine, University of California Los Angeles, Los Angeles, CA.
6. Institute of Precision Health, David Geffen School of Medicine, University of California Los Angeles, Los Angeles, CA.
7. Children's Discovery and Innovation Institute, Department of Pediatrics, David Geffen School of Medicine, University of California Los Angeles, Los Angeles, CA.
8. The Molecular Biology Institute, David Geffen School of Medicine, University of California Los Angeles, Los Angeles, CA.
9. Eli and Edythe Stem Cell Institute, David Geffen School of Medicine, University of California Los Angeles, Los Angeles, CA.

#### **\*CORRESPONDENCE**

Marlin Touma, MD, PhD.

Department of Pediatrics, David Geffen School of Medicine, University of California, Los Angeles. 675 Charles E. Young Dr S, 3762 MacDonald Research Laboratories, Los Angeles, CA 90024. USA.

Tel: 310-825-6478 / Fax: 310-267-0154

Email: [mtouma@mednet.ucla.edu](mailto:mtouma@mednet.ucla.edu)

#### **This PDF file includes:**

Tables S1 to S4

Supplemental Figure 1, 2

**Table S1. Primers used in real time PCR**

|                    | <b>Sequence ( (5' → 3')</b>    | <b>Purpose</b>       |
|--------------------|--------------------------------|----------------------|
| mPpp1r1b LncRNA    | F: GCATCTGAGCAGCTGTGCAGCA      | gene Expression; RIP |
|                    | R: CCTCCTCATCATCCTCCTGTGGGT    |                      |
| mMyogenin          | F: GCAGGCTCAAGAAAGTGAATGA      | gene Expression      |
|                    | R: TAGGCGCTCAATGTAAGGAT        |                      |
| mMyoD1             | F: CCACTCCGGGACATAGACTTG       | gene Expression      |
|                    | R: AAAAGCGCAGGTCTGGTGAG        |                      |
| mDystrophin        | F: GGAAAGCAACACATAGACAACCT     | gene Expression      |
|                    | R: GGGCATGAACTCTGTAGATCC       |                      |
| mTbx5              | F: ACTTTGTGAGCACCCAGCTGAGT     | gene Expression      |
|                    | R: CGATCTCAGTGTCTGCTCTGCTCT    |                      |
| hPpp1r1b LncRNA    | F: AAGGCTGGGGACCTTCCAAGTGAAG   | gene Expression      |
|                    | R: GGAGGAGAGTTCACCTTCGTGAGCCAC |                      |
| hMyogenin          | F: GGGGAAAACCTACCTGCCTGTC      | gene Expression      |
|                    | R: AGGCGCTCGATGTAAGGAT         |                      |
| hMyoD1             | F: CGCCATCCGCTATATCGAGG        | gene Expression      |
|                    | R: CTGTAGTCCATCATGCCGTCG       |                      |
| hDystrophin        | F: AGCAAGAGCACAACAATTTGGT      | gene Expression      |
|                    | R: CCCTGTTTCGTCCCGTATCATAA     |                      |
| hTbx5              | F: CTGTGGCTAAAATCCACGAAGT      | gene Expression      |
|                    | R: GTGATCGTCGGCAGGTACAAT       |                      |
| m h Troponin T2    | F: CGTGAGGAGGAGGAGAACAG        | gene Expression      |
|                    | R: TCCTCTCTGCCAGGATCTTC        |                      |
| mMyogenin promoter | F: GAGCCCCACTTCTATGATGG        | CHIP; CHIRP          |
|                    | R: GAAGAAAAGGGACTGGGGAC        |                      |
| mMyoD1 promoter    | F: GTCTCTCTGCCCTCCTTCCT        | CHIP; CHIRP          |
|                    | R: CAAGCTCCGCCCTACTACAC        |                      |
| mTbx5 Promoter     | F: TCCTTCCTTCCTTCCTCCTCC       | CHIRP                |
|                    | R: CCCATCCTCTTTACCCTCCTCCAT    |                      |
| hMyogenin promoter | F: AGCCTACCCTTCCTTGTCC         | CHIRP                |
|                    | R: GAGGACACATTCCCCTCTCA        |                      |
| hMyoD1 promoter    | F: GCGTGTCTCTCAGCCTCTTT        | CHIRP                |
|                    | R: CTCCTCTGTCCCCTGATTTG        |                      |
| hTbx5 Promoter     | F: ACAAATAGAGTGCCTCGTGCCTCG    | CHIRP                |
|                    | R: AATGCAATTCGTCCCAGAGTGGC     |                      |

**Table S2. Antibodies**

| Antibody Name            | Purpose                     | Manufacture                                         |
|--------------------------|-----------------------------|-----------------------------------------------------|
| myosin, sarcomere        | Immunofluorescence staining | Developmental Studies Hybridoma Bank, Iowa City, IA |
| Histone H3K27me3         | CHIP                        | Active Motif, Carlsbad, CA                          |
| MyoD                     | Western                     | BD Biosciences, San Jose, CA                        |
| Myogenin                 | Western                     | NOVUS, Centennial, CO                               |
| Tropomyosin (Sarcomeric) | Western                     | Sigma, St. Louis, MO                                |
| Cardiac troponin T       | Western                     | Abcam, Cambridge, MA                                |
| EZH2                     | Western, RIP                | Cell Signalling Technology, Danvers, MA             |

**Table S3. GapmeR and siRNA sequence**

|                | Sequence ( 5' → 3')   | Target (Transcript ID) |
|----------------|-----------------------|------------------------|
| GapmeR (mouse) | CGAGGAAAGGAACAGT      | ENSMUST00000152525.1   |
| siRNA (human)  | CCCUCAUGGAUCCUUCUCUTT | ENST00000580029.1      |
|                | AGAGAAGGAUCCAUGAGGGTT |                        |

**Table S4. Capture probes used for ChIRP**

| Probe Name            | Sequence ( 5' → 3')            |
|-----------------------|--------------------------------|
| mPpp1r1b207-probe     | TGCACAGCTGCTCAGATG/3BioTEG     |
| hPpp1r1b206-probe mix | CTGGTAGAGAAGGATCCATGAG/3BioTEG |
|                       | CAAGCTAAGACTTAGTGCTGTG/3BioTEG |
|                       | AAGCTATCCAGGCAATAAAAGC/3BioTEG |
|                       | TCATAGATGCCAATCCACATAC/3BioTEG |
|                       | AGAGGAGACCGAGGAAAGCAAG/3BioTEG |

A

## ORF Prediction

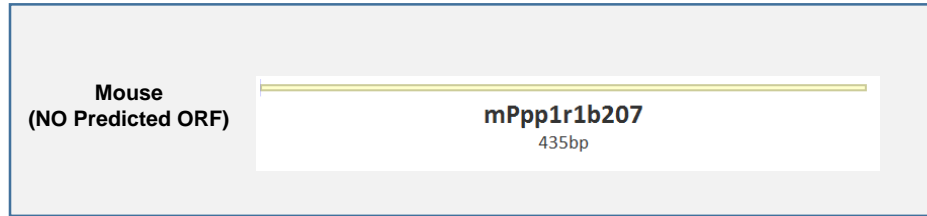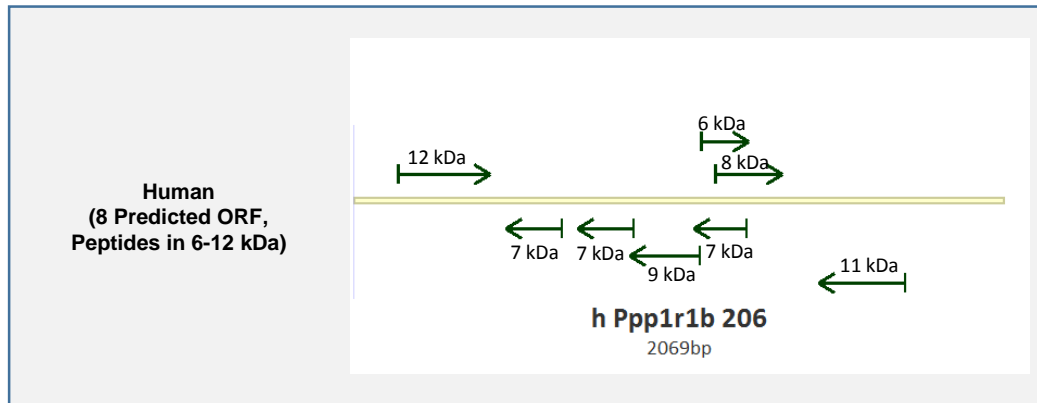

B

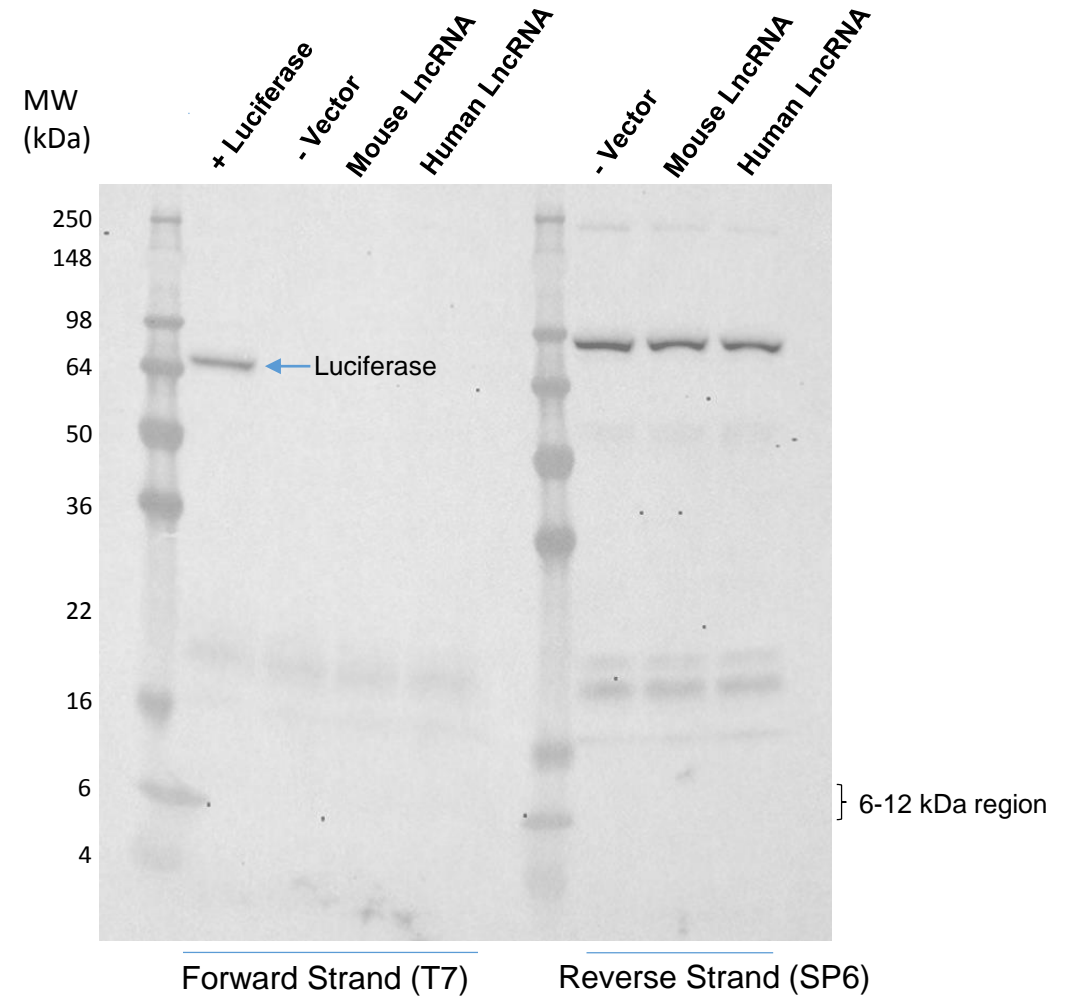

**Supplemental Figure 1. *In vitro* transcription and translation assay.** The full-length mouse and human lncRNA cDNA was cloned into pcmsport 6.1 vector, which contains a T7 or a SP6 promoter. The Transend non-radioactive system was used to incorporate biotinylated lysine into nascent proteins. **A.** ORF prediction of Ppp1r1b-lncRNA in mouse and human orthologues. **B.** *in vitro* transcription-translation assay results. Right brace indicate the region of peptide bands on the western blot if they are expressed.

**A**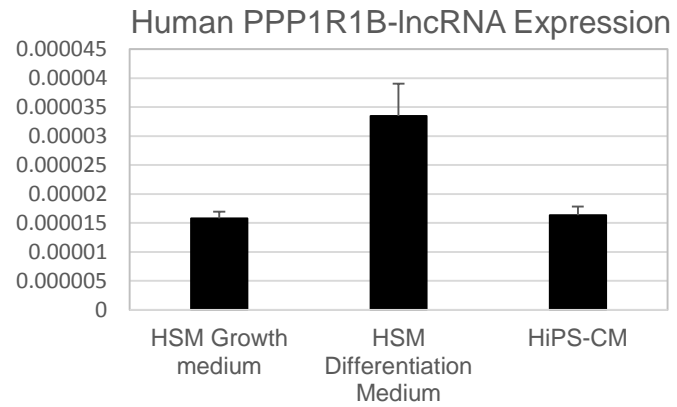**B**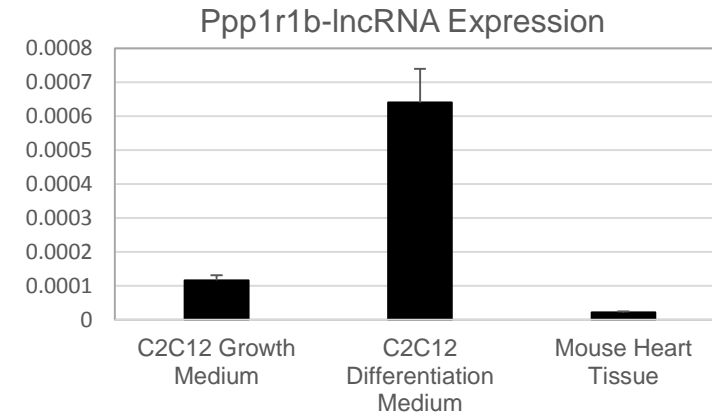

**Supplemental Figure 2. *In vitro and in vivo* Expression of Ppp1r1b-lncRNA in our used systems.** RT-PCR was performed with isolated RNA from different systems. **A.** Human PPP1R1B-lncRNA expression. Human skeletal myoblasts (HSM) before and after myotube differentiation as well as human iPSC-derived cardiomyocytes were used. **B.** Mouse Ppp1r1b-lncRNA expression. Mouse skeletal myoblasts (C2C12) before and after myotube differentiation as well as mouse neonatal heart tissue were used.
